# Supplementary material for: Isolation and Functional Determination of SKOR Potassium Channel in Purple Osier Willow, Salix purpurea
Source: Hindawi journal article supplement (doi:10.1155/2021/6669509), 2021-02-25
Supplement: f1 [file 6669509.f1.zip]

|           |                                                                                                         |     |
|-----------|---------------------------------------------------------------------------------------------------------|-----|
| SpuSKOR   | MDGHVSHREHNKKE.SDGDDEKEEEYEVDKDKRIKSSRGSRFNLEIEFGLVNNTESSSMTSWRRKLSRESVINGIRYVSSGFVIHPDNRWYRAWTKFIL     | 100 |
| PtrSKOR   | MDGHGNHREHNKKE.DSDDDGEEYEVEDLKDKRIKSSRGSRFNLEIEFGLVNNNGSSSMTSWRRKLSRESVINGIRYVSSGFVIHPDNRWYRAWTKFIL     | 99  |
| Consensus | mdgh hre nkke d dd eeeyev d kdrikssrgsrfnliekefglvnn sssmtswrrklsresving ryvssgfvihpdnrwrawtkfil        |     |
| SpuSKOR   | LWAVYSSFFTPLEFGFFRGLPENLFILDIVGQVAFLLDIIQFFIAYRDSQTYRTVYKRSPIALRYLKSHFIIDLLACLPWDIIYKVCGHKEEVRYLLWI     | 200 |
| PtrSKOR   | LWAVYSSFFTPMEFGFFRGLPENLFILDIVGQVAFLLDIIQFFIAYRDSQTYRTVYKRSPIALRYLKSHFIIDLLACLPWDIIYKACGHKEEVRYLLWI     | 199 |
| Consensus | lwavysfftp efgffrglpenlfildivgqvaflldii qffiayrdsqtyrtvykr pialrylkshfiidllaclpwdiik cgh eevryllwi      |     |
| SpuSKOR   | LSRVRKVTFFQMEKDIRINYLFTRIVKLIVVELYCTHTAACIFYLASTLPSSQEGYTWIGSLKMGDYSYTSFREIDIWKRYTSLYFAIITMATVG         | 300 |
| PtrSKOR   | LSRVRKVTFFQMEKDIRINYLFTRIVKLIVVELYCTHTAACIFYLATLPSSQEGYTWIGSLKMGDYSYTSFREIDIWKRYTSLYFAVITMATVG          | 299 |
| Consensus | lsrvrkvt ffq mekdirinylftrivklivvelychthaacify la tlpssqegytwigslkmgdysytsfreidiwkry tslyfa itmatvg     |     |
| SpuSKOR   | YGDIAHVNLMREMIFVMIYVSFDMILGAYLIGNMTALIVKGSKTEFRDKMTDLIKYMNRNRLGKEIRNQIKGHVRLQYESSYTEASALQDLPISIRAKVS    | 400 |
| PtrSKOR   | YGDIAHVNLMREMIFVMIYVSFDMILGAYLIGNMTALIVKGSKTEFRDKMTDLIKYMNRNRLGKDIRNQIKGHVRLQYESSYTEASALQDLPISIRAKVS    | 399 |
| Consensus | ygdiahvnlmremifvmiyyvsfmdmilgaylignmtalivkgskte frdkmtdlikymnrnrlgk irnqikghvrlqyessyteasalqdlpisirakvs |     |
| SpuSKOR   | QTLYTEYIEKVPLLKGCSAEFINQIVIRLHEEFFLPGEVIMEQGNVVDQYFVCHGVLEEVGIGQDGSEETVKLLPPNSSFGEISILCNIPQPYTVRVCE     | 500 |
| PtrSKOR   | QTLYTEYIEKVPLLKGCSAEFINQIVIRLHEEFFLPGEVIMEQGNVVDQYFVCHGVLEEVGIGQDGSEETVKLLPPNSSFGEISILCNIPQPYTVRVCE     | 499 |
| Consensus | qtltyeyiekvplllkgcsaefinqivirlheefflpgevimeqgnvvdq yfvchgvleevgigqdgseetvklppnssfgeisilcnipqpytvrce     |     |
| SpuSKOR   | LCRLLRIDKQSFNSILEIFYDGRKILDNLLEGKESNLRDKQLES DITFHIGKQEAELALS VNNAAHYGDLYQLKGFIRAGADPNKTDYDGRSPLHLAAS   | 600 |
| PtrSKOR   | LCRLLRIDKQSFNSILEIFYDGRKILDNLLEGKESNLRDKQLES DITFHIGKQEAELALRVNSAAYHGDLYQLKGFIRAGADPNRTDYDGRSPLHLAAS    | 599 |
| Consensus | lcrllridkqsfnsileiyfydgrkildnllegkesnlrdkqlesditfhigkqeaelal vn aayhgdlyqlkgfiragadpn tdydgrsplhlaas    |     |
| SpuSKOR   | RGYEDITLFLIQEGVDINIKDKFGNTPLLEAIKNGHDRVESLLFKQGAILNIDDAGSVLCRAVARGSDFLKRVLSNGIDPNSKDYDHRTPLHVAASEGL     | 700 |
| PtrSKOR   | RGYEDITLFLIQEGVDINIKDKFGNTPLLEAIKNGHDRVESLLFKQGAILNIDDAGSVLCRAVARGSDFLKRVLSNGIDPNSKDYDHRTPLHVAASEGL     | 699 |
| Consensus | rgyeditlfliqegvdinikdkfgntplleaiknghdrvesllfkqgailniddagsvlcravargdsdflkr lsnqidpnskdychrtplhvaasegl    |     |
| SpuSKOR   | YLMAKLLIEAGAVFSKDRWGNTPLDEGRMCGSKNLIKLEEAQSSQKLD FHYSTHETREKVLPKKCTIFPFHPRGSEEQRRPGVVLWVPNTMEELVKAA     | 800 |
| PtrSKOR   | YLMAKLLIEAGASVFSKDRWGNTPLDEGRMCGNKKLIKLEEAQSSQKLE FHYSTHETREKVLPKKCTIFPFHPR.AEEQRRPGVVLWVPNTMEELVKAA    | 798 |
| Consensus | ylmakllieaga vfskdrwgntpldegrmcg k liklleeaqssqkl fhysthet ekvlpkkctifpfhpr eeqrpgvvlwvp tmeelvk a      |     |
| SpuSKOR   | SEQLQFPDGCSCILTEDAGKILDVNMIDGGQKLYLTSRTHOL                                                              | 842 |
| PtrSKOR   | SEQLQFPDGCSCILSEDAGKILDVNMIDGGQKLYLTSRQTHYL                                                             | 840 |
| Consensus | seqlqfpdg cil edagkildv mid gqklyltsd th l                                                              |     |
