# Supplementary figures and images for: Isolation and Functional Determination of SKOR Potassium Channel in Purple Osier Willow, Salix purpurea
Source: Hindawi journal article supplement (doi:10.1155/2021/6669509), 2021-02-25

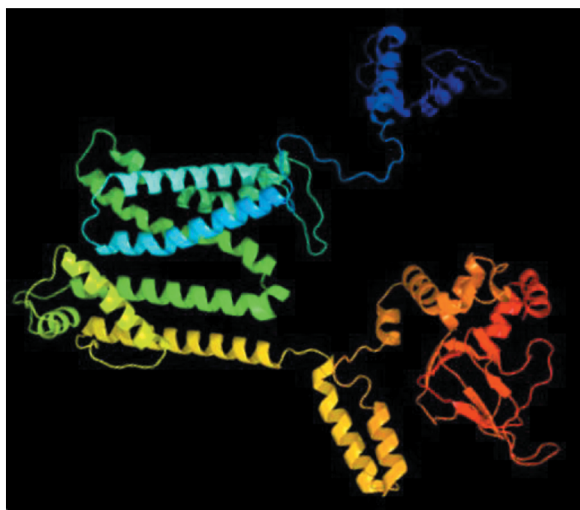

**SpuSKOR**

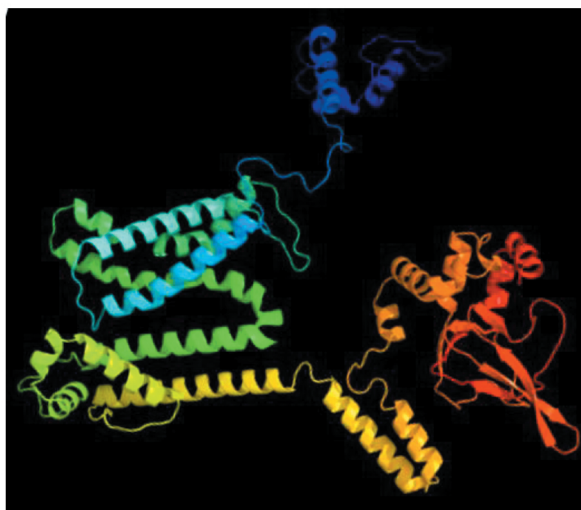

**PtrSKOR**

Supplement: f1 [file 6669509.f1.zip]
